# Supplementary material
Source: Springer Nature journal article supplement (https://www.springermedizin.de/resource/supplementary/12889_2013_5987_MOESM10_ESM.pdf/9494084)
Supplement: MOESM10 [file 9494084]

**Upper Management Consultation & Consent**

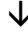

**Representatives consultation workshop**

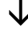

**Consent & Randomisation of Units/Worksites**

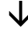

**Individual Recruitment and Consent**  
Group information sessions; expressions of interest; telephone screening for eligibility; written informed consent

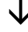

**Assessment 1 (Baseline)**  
Blood test; anthropometrics; survey; 7-day activity monitor wear

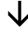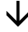

**INTERVENTION GROUP**

**CONTROL GROUP**

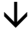

**Participant Information & Brainstorming Session**  
Education, group feedback from Assessment 1, brainstorming of strategies; email summary



**Workstation Installation**  
**Individual Coaching**  
Education; individual Assessment 1 feedback; goal setting; workstation instruction

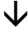

**Telephone calls x 4 (weeks 2, 4, 8 & 12):**  
progress review; problem solving; goal-setting.  
**Management Emails x 6 (weeks 2, 4, 6, 8, 10 & 12)**

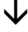

**Assessment 2 (3 months/End of Intervention)**  
Blood test; anthropometrics; survey; 7-day activity monitor wear

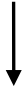

**Assessment 3 (12 months)**  
Blood test; anthropometrics; survey; 7-day activity monitor wear

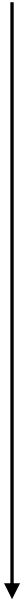

**Assessment 2 (3 months)**  
Blood test; anthropometrics; survey; 7-day activity monitor wear

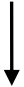

**Assessment 3 (12 months)**  
Blood test; anthropometrics; survey; 7-day activity monitor wear

Intervention (3 months)

Maintenance (9 months)
